# Supplementary material for: Anionic metal–organic frameworks lead the way to eco-friendly high-energy-density materials
Source: Royal Society of Chemistry journal article supplement (doi:10.1039/c6ta02340a), 2016-01-01
Supplement: c6ta02340a1.pdf [file c6ta02340a1.pdf]

## Electronic Supplementary Information

### Anionic Metal-Organic Frameworks Lead the Way to Eco-Friendly High-Energy-Density Materials

Yongan Feng,<sup>a</sup> Yangang Bi<sup>‡, b</sup>, Wenyuan Zhao<sup>‡, a</sup> and Tonglai Zhang<sup>\*, a</sup>

<sup>a</sup> State Key Laboratory of Explosion Science and Technology, Ministry of Science and Technology of China, School of Mechatronical Engineering, Beijing Institute of Technology, 5 South Zhongguancun Street, Beijing 100081, P. R. China

<sup>b</sup> Key Laboratory of Polymer Chemistry and Physics of the Ministry of Education of China, Department of Polymer Science and Engineering, College of Chemistry and Molecular Engineering, Peking University, 5 Yiheyuan Road, Beijing 100871, P. R. China

<sup>‡</sup> These authors contributed equally to this work

\* Corresponding Author: Prof. Tonglai Zhang

Email:

Tonglai Zhang: ztlbit@bit.edu.cn

Yongan Feng: fengyongan0918@126.com

## **Table of contents**

1. Materials and instruments
2. Synthetic procedures
3. X-ray powder diffraction (XRPD)
4. X-ray crystallography determinations
5. Hydrogen bond
6. Thermo-stability measurement (TG and DSC)
7. Non-isothermal kinetics analysis
8. Sensitivity
9. Heat of formation
10. Heat of detonation
11. Detonation performances
12. References

## 1. Materials and instruments

All the materials and chemical reagents with analytical grade were bought from the reagents company (Aladdin) and used without further purification. IR spectra of ligand was measured on a Bruker Equinox 55 infrared spectrometer by using KBr pellets from 400 to 4000  $\text{cm}^{-1}$  with a resolution of 4  $\text{cm}^{-1}$ . Elemental analyses (C, H and N) were performed on a Flash EA 1112 fully automatic trace element analyzer. The purities of the bulk samples were verified by X-ray powder diffraction (XRPD) measurements performed on a Bruker D8 advance diffractometer at 60 kV, 300 mA and Cu K $\alpha$  radiation ( $\lambda=1.5406 \text{ \AA}$ ), with a scan speed of  $5^\circ\cdot\text{min}^{-1}$  and a step size of  $0.02^\circ$  in  $2\theta$ . The single crystal X-ray diffraction data collections were carried out on a Rigaku AFC-10/Saturn 724+CCD diffractometer with graphite-monochromated Mo K $\alpha$  radiation ( $\lambda=0.71073 \text{ \AA}$ ) using the multi-scan technique. The structures were determined by direct methods using SHELXS-97<sup>1</sup> and refined by full-matrix least-squares procedures on  $F_2$  with SHELXL-97.<sup>2</sup> All non-hydrogen atoms were obtained from the difference Fourier map and subjected to anisotropic refinement by full-matrix least squares on  $F_2$ . Hydrogen atoms were obtained geometrically and treated as riding on the parent atoms or were constrained in the locations during refinements. Thermal stability measurements were performed/tested/analyzed by using differential scanning calorimetry (DSC) on a CDR-4 of Shanghai Precision & Scientific Instrument Co., Ltd. at a heating rate of  $5^\circ\text{C min}^{-1}$  from  $50^\circ\text{C}$  to  $500^\circ\text{C}$ . Thermogravimetric analyses (TG) were operated on a Netzsch STA 449C instrument at a heating rate of  $5^\circ\text{C min}^{-1}$  from  $50^\circ\text{C}$  to  $600^\circ\text{C}$  under dry oxygen-free nitrogen atmosphere with a flowing rate of  $20 \text{ mL min}^{-1}$ . Impact sensitivities were tested by fall hammer apparatus applying standard staircase method using a 2 kg drop weight and the results were reported in terms of height for 50% probability of explosion ( $h_{50\%}$ ).<sup>3</sup> The friction sensitivities were measured on a Julius Peter's apparatus by following the BAM method. The electrostatic sensitivities were analyzed by using JGY-50(III) Electrostatic test apparatus.<sup>4</sup>

## 2. Synthetic procedures

Caution! Although no accidents occurred during the synthesis and handling of the materials discussed in this work, these compounds are high-energy materials and tend to explode under certain conditions. All of the complexes should be treated with discretion and appropriate safety precautions must be taken at all times. Bis(tetrazole) methane (H2btm) was synthesized by using an improved greener preparation method based on Sherpless method in order to expand production capacity and reduce the cost.

**Bis(tetrazole)methane (H2btm).** Malononitrile (97mmol, 6.407g), sodium azide (232.8mmol, 15.137g), and zinc chloride (194mmol, 26.442g) were suspended in water (400 mL) and the mixture reacted under reflux for 12h. After cooling to room temperature, NaOH (15.52g, 100mL) was added to form the precipitation of zinc hydroxide. The filtrate was collected by filtration and acidized with concentrated HCl (57.35g, 100mL). After evaporation, water was removed. The remaining solid was extracted by boiling isopropyl alcohol. H2btm was obtained by removing isopropyl alcohol, 89% yield. This reaction can be scaled up to larger amounts.  $T_m=214.9^\circ\text{C}$ .  $^1\text{H NMR}$  (400 MHz,  $[\text{D}_6]$  DMSO, ppm): 4.75 (2H, s,  $\text{CH}_2\text{CN}_4\text{H}$ ); 15.55(2H, br. s,  $\text{CN}_4\text{H}$ ). IR ( $\text{cm}^{-1}$ , KBr): 3200, 2800, 1567, 1452, 1432, 1405, 1273, 1242, 1197, 1105, 1076. Elemental analysis (%) for  $\text{C}_3\text{H}_4\text{N}_8$  (152.12): C, 23.69; H, 2.65; N, 73.66; found: C, 23.57; H, 2.59; N, 73.58%.

**(AG)<sub>3</sub>(Co (btm)<sub>3</sub>) (1).** A mixture of H2btm (0.456g, 3mmol) and NaOH (0.24g, 6mmol) were dissolved in 10 mL of water and stirred at  $70^\circ\text{C}$  for 10 min to form a faint yellow solution. Then aminoguanidine hydrochloride (0.663g, 6mmol) in 5 mL water was added to the above-mentioned solution. Then the mixture was stirred at  $70^\circ\text{C}$  for 20 min.  $\text{CoCl}_2\cdot 6\text{H}_2\text{O}$  (0.238 g, 1 mmol) was dropped gradually to the solution, and immediately the fresh pink precipitation was produced. About 10 min later, the precipitation disappeared and formed orange clear solution. The clear solution was cooled down to room temperature. After filtration, the crystals suitable for single-crystal X-ray diffraction measurement were obtained by slow crystallization from water (Yield 89%). Elemental analysis (%) for  $\text{C}_{12}\text{H}_{27}\text{N}_{36}\text{Co}_1$  (734.52): C, 19.62; H, 3.71; N, 68.65. Found: C, 19.58; H, 3.66; N, 68.61%. The XPS spectrum of the crystalline sample shows evident satellite peaks of 780eV, suggesting Co (III) in compound **1**.

**{(AG)<sub>2</sub>[Cu (btm)<sub>2</sub>]}<sub>n</sub> (2).** The synthesis method for compound **2** was similar to that of **1** except that 1 mmol of  $\text{CuCl}_2\cdot 2\text{H}_2\text{O}$  was used instead of 1 mmol of  $\text{CoCl}_2\cdot 6\text{H}_2\text{O}$ . The crystals suitable for single-crystal X-ray diffraction measurements were obtained by slow crystallization from water (Yield 86%). Elemental analysis (%) for  $\text{C}_8\text{H}_{18}\text{N}_{24}\text{Cu}_1$  (513.94): C, 18.69; H, 3.53; N, 65.41. Found: C, 18.62; H, 3.47; N, 65.34. The XPS spectrum of the crystalline sample shows evident satellite peaks of 933eV, suggesting Cu (II) in compound **2**.

### 3. X-ray powder diffraction (XRPD)

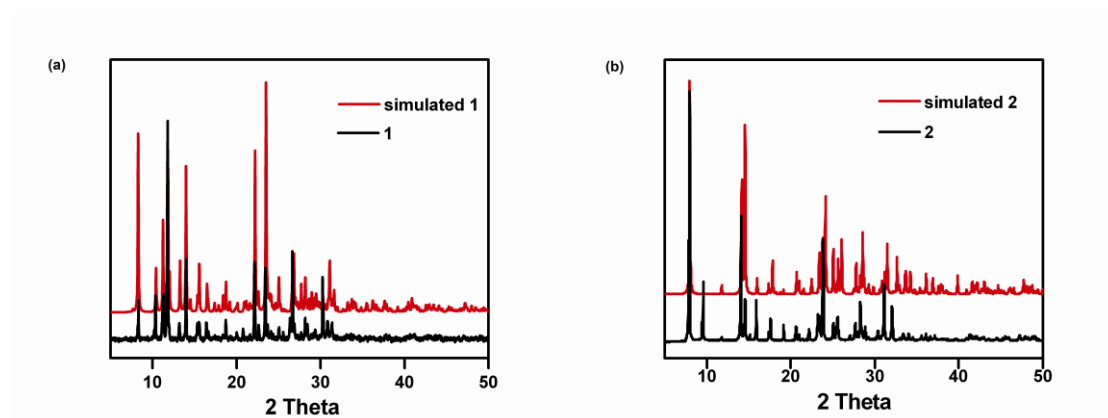

**Figure S1.** (Left) X-ray powder diffraction (XRPD) curve of compound **1**. (Right) XRPD curve of compound **2**.

### 4. X-ray crystallography determinations

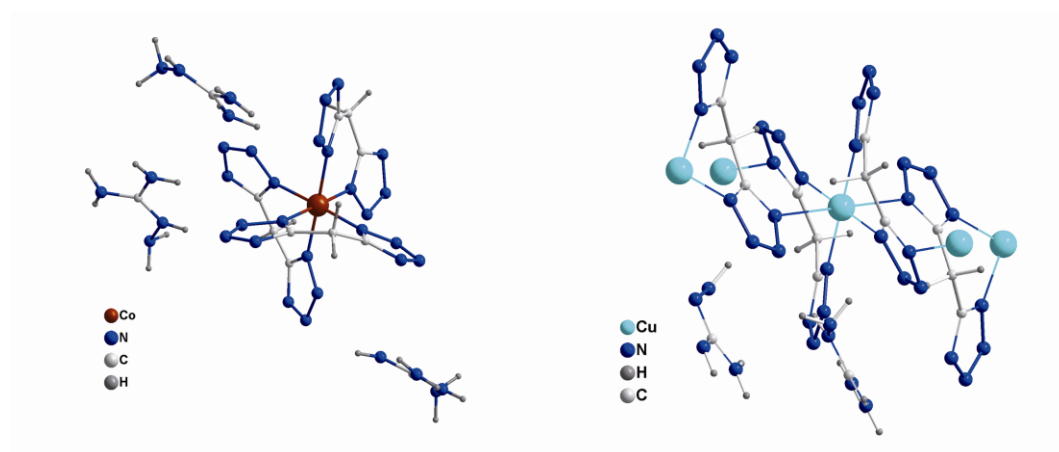

**Figure S2.** (Left) Molecule structure of compound **1**. (Right) Molecule structure of compound **2**.

**Table S1.** Crystal data and structure refinement details for the two complexes.

| Item              | 1                                           | 2                                        |
|-------------------|---------------------------------------------|------------------------------------------|
| CCDC              | 1449926                                     | 1449928                                  |
| Empirical formula | $\text{CoC}_{12}\text{H}_{27}\text{N}_{36}$ | $\text{CuC}_8\text{H}_{18}\text{N}_{24}$ |
| Formula weight    | 734.63                                      | 514                                      |
| Temperature/K     | 153(2)                                      | 101.8                                    |
| Crystal system    | monoclinic                                  | monoclinic                               |
| Space group       | $P_{21}/c$                                  | $P_{21}/c$                               |
| $a/\text{\AA}$    | 10.859(2)                                   | 11.590(5)                                |
| $b/\text{\AA}$    | 15.719(3)                                   | 10.2064(5)                               |
| $c/\text{\AA}$    | 17.294(3)                                   | 8.269(4)                                 |
| $\alpha/^\circ$   | 90                                          | 90                                       |

|                                                |                                     |                                      |
|------------------------------------------------|-------------------------------------|--------------------------------------|
| $\beta/^\circ$                                 | 100.957(3)                          | 107.10(5)                            |
| $\gamma/^\circ$                                | 90                                  | 90                                   |
| Volume/ $\text{\AA}^3$                         | 2898.3(10)                          | 934.9(6)                             |
| Z                                              | 4                                   | 2                                    |
| $\rho_{\text{calc}}/\text{g cm}^{-3}$          | 1.684                               | 1.826                                |
| $\mu/\text{mm}^{-1}$                           | 0.672                               | 1.231                                |
| F(000)                                         | 1512                                | 526                                  |
| Crystal size/ $\text{mm}^3$                    | $0.47 \times 0.33 \times 0.22$      | $0.50 \times 0.50 \times 0.45$       |
| Radiation                                      | MoK $\alpha$ ( $\lambda = 0.7107$ ) | Mo K $\alpha$ ( $\lambda = 0.7107$ ) |
| 2 $\theta$ range for data collection/ $^\circ$ | 4.62 to 58.26                       | 6.7 to 51.94                         |
| Reflections collected                          | 25540                               | 3797                                 |
| Independent reflections                        | 7745                                | 1833                                 |
| Data/restraints/parameters                     | 7745/0/527                          | 1833/0/151                           |
| Goodness-of-fit on F2                          | 1.002                               | 1.091                                |
| Final R indexes [ $I \geq 2\sigma(I)$ ]        | R1 = 0.0547                         | R1 = 0.0293                          |
| Final R indexes [ $I \geq 2\sigma(I)$ ]        | wR2 = 0.1511                        | wR2 = 0.0663                         |
| Final R indexes [all data]                     | R1 = 0.0619                         | R1 = 0.0333                          |
| Final R indexes [all data]                     | wR2 = 0.1593                        | wR2 = 0.0680                         |
| Largest diff. peak/hole/ $e \text{\AA}^{-3}$   | 0.51/-0.71                          | 0.33/-0.35                           |

**Table S2.** Selected bond lengths ( $\text{\AA}$ ) and bond angles ( $^\circ$ ) for the complexes.

| Compound 1  |              |                   |             |
|-------------|--------------|-------------------|-------------|
| Item        | Bond lengths | Item              | Bond angles |
| Co(1)-N(17) | 1.9112(18)   | N(1)-Co(1)-N(16)  | 178.58(7)   |
| Co(1)-N(1)  | 1.9192(19)   | N(8)-Co(1)-N(24)  | 178.14(8)   |
| Co(1)-N(24) | 1.9233(18)   | N(9)-Co(1)-N(17)  | 178.11(8)   |
| Co(1)-N(16) | 1.9312(19)   | N(1)-Co(1)-N(8)   | 88.63(8)    |
| Co(1)-N(9)  | 1.9344(19)   | N(8)-Co(1)-N(16)  | 92.78(8)    |
| Co(1)-N(8)  | 1.9358(18)   | N(1)-Co(1)-N(9)   | 92.04(8)    |
| Compound 2  |              |                   |             |
| Item        | Bond lengths | Item              | Bond angles |
| Cu(1)-N(1)  | 2.0229(17)   | N(1)-Cu(1)-N(1')  | 180.00(7)   |
| Cu(1)-N(1') | 2.0229(17)   | N(5')-Cu(1)-N(1') | 85.29(7)    |

|             |            |                  |          |
|-------------|------------|------------------|----------|
| Cu(1)-N(4)  | 2.535      | N(5)-Cu(1)-N(1') | 94.71(7) |
| Cu(1)-N(4') | 2.535      | N(5)-Cu(1)-N(1)  | 85.29(7) |
| Cu(1)-N(5)  | 2.0084(19) | N(5')-Cu(1)-N(1) | 94.71(7) |
| Cu(1)-N(5') | 2.0084(19) | N(5)-Cu(1)-N(5') | 180.0    |

## 5. Hydrogen bond

Due to 29 different connection atoms combinations, there are 29 different kinds of H-bonds in Compound **1**. Each connection atoms combination corresponds to only one kind of H-bond. Likewise, 12 different kinds of H-bonds exist in compound 2. Detailed information is shown in the table below.

**Table S3.** Selected bond lengths (Å) and bond angles (°) for the complexes.

| Compound 1            |         |           |           |            |
|-----------------------|---------|-----------|-----------|------------|
| A—H···B               | A—H (Å) | H···B (Å) | A···B (Å) | Angles (°) |
| N(25) —H(25A)···N(23) | 0.9700  | 2.2800    | 3.1885    | 155.00     |
| N(25) —H(25B)···N(3)  | 0.9600  | 2.2300    | 3.1495    | 160.00     |
| N(26) —H(26)···N(5)   | 0.82    | 2.1700    | 2.9898    | 175.00     |
| N(27) —H(27A)···N(4)  | 0.8800  | 2.2200    | 3.0719    | 163.00     |
| N(27) —H(27B)···N(6)  | 0.8500  | 2.3200    | 3.1421    | 163.00     |
| N(28) —H(28A)···N(25) | 0.8500  | 2.2600    | 2.6690    | 109.00     |
| N(28) —H(28B)···N(13) | 0.8900  | 2.3300    | 3.0933    | 144.00     |
| N(29) —H(29A)···N(7)  | 0.9100  | 2.2900    | 3.0575    | 141.00     |
| N(29) —H(29B)···N(19) | 0.9100  | 2.1000    | 2.9663    | 159.00     |
| N(30) —H(30)···N(21)  | 0.9000  | 2.0800    | 2.9747    | 168.00     |
| N(31) —H(31A)···N(14) | 0.8300  | 2.1200    | 2.9043    | 158.00     |
| N(31) —H(31B)···N(21) | 0.9000  | 2.6100    | 3.3049    | 135.00     |
| N(31) —H(31B)···N(22) | 0.9000  | 2.0900    | 2.9585    | 163.00     |
| N(32) —H(32A)···N(10) | 0.9800  | 2.1700    | 3.1112    | 161.00     |
| N(32) —H(32A)···N(11) | 0.9800  | 2.4400    | 3.2258    | 137.00     |
| N(32) —H(32B)···N(29) | 0.9000  | 2.2600    | 2.6513    | 106.00     |
| N(33) —H(33A)···N(20) | 0.8900  | 2.4800    | 3.1993    | 138.00     |
| N(33) —H(33B)···N(11) | 0.9200  | 2.2300    | 3.1065    | 161.00     |
| N(33) —H(33B)···N(12) | 0.9200  | 2.5200    | 3.1719    | 129.00     |
| N(34) —H(34)···N(2)   | 0.8800  | 2.3300    | 3.1628    | 159.00     |
| N(35) —H(35A)···N(7)  | 0.8100  | 2.2600    | 3.0716    | 173.00     |
| N(35) —H(35B)···N(2)  | 0.9300  | 2.5300    | 3.3560    | 149.00     |

|                       |           |           |           |            |
|-----------------------|-----------|-----------|-----------|------------|
| N(35) —H(35B)---N(3)  | 0.9300    | 2.4800    | 3.2747    | 144.00     |
| N(36) —H(36A)---N(15) | 0.8600    | 2.2100    | 3.0160    | 155.00     |
| N(36) —H(36B)---N(33) | 0.8300    | 2.3500    | 2.7061    | 107.00     |
| N(36) —H(36B)---N(33) | 0.8300    | 2.4300    | 3.1332    | 143.00     |
| C(2) —H(2B)---N(13)   | 0.9900    | 2.6000    | 3.2657    | 124.00     |
| C(8) —H(8A)---N(11)   | 0.9900    | 2.4300    | 3.2081    | 135.00     |
| C(8) —H(8B)---N(20)   | 0.9900    | 2.5700    | 3.5292    | 164.00     |
| Compound 2            |           |           |           |            |
| A—H---B               | A---H (Å) | H---B (Å) | A---B (Å) | Angles (°) |
| N(9) —H(9A)---N(7)    | 0.8800    | 2.1200    | 2.9578    | 160.00     |
| N(9) —H(9B)---N(6)    | 0.8800    | 2.0600    | 2.9380    | 171.00     |
| N(9) —H(9B)---N(7)    | 0.8800    | 2.5000    | 3.2934    | 150.00     |
| N(10) —H(10A)---N(8)  | 0.8800    | 2.2600    | 3.1111    | 163.00     |
| N(10) —H(10B)---N(12) | 0.8800    | 2.3300    | 2.6655    | 103.00     |
| N(10) —H(10B)---N(7)  | 0.8800    | 2.5700    | 3.2580    | 136.00     |
| N(11) —H(11)---N(3)   | 0.8800    | 2.1200    | 2.8818    | 144.00     |
| N(12) —H(12B)---N(4)  | 0.8700    | 2.6000    | 3.3002    | 138.00     |
| C(1) —H(1B)---N(2)    | 0.9900    | 2.4900    | 3.3024    | 139.00     |
| N(12) —H(12A)---N(9)  | 0.8000    | 2.2700    | 2.6707    | 111.00     |
| N(12) —H(12B)---N(3)  | 0.8500    | 2.5500    | 3.2451    | 140.00     |
| N(12) —H(12B)---N(4)  | 0.8500    | 2.3000    | 3.1314    | 169.00     |

## 6. Thermo-stability measurement (DSC and TG)

To investigate the thermal behavior of compound 1 and 2, DSC and TG-DTG of two compounds are tested with a linear heating rate of 5°C min<sup>-1</sup> in flowing N<sub>2</sub> (flow rate 20mL min<sup>-1</sup>). The curves are shown in figure S3 and S4.

In the DSC curve of compound **1**, a melting point peak came out/appeared at 268.1 °C, then a Intense endothermic process can be seen at 285.5-312.2 °C. TG-DTG curves showed that the first mass loss occurred very rapidly and the percentage of total mass loss was 39.6%. The second exothermic decomposition stage was seen in the DSC curve between 312.2-384.8 °C and a peak was observed at 346.5 °C. The TG curve showed the mass loss of 17.6% in the second stage of decomposition. The third exothermic peak can be seen at 411 °C in the DSC curve. Residue mass accounted percentage of 24.9%, which is in good agreement with the calculated value of Co and C (27.6%) . It is within margin of error.

In the DSC curve of compound **2**, a melting point peak appeared at 212.5 °C, then two intense endothermic peaks can be seen at 248.6 and 393.7 °C, respectively. TG-DTG curves showed that the first

mass loss occurred very rapidly and the percentage of total mass loss was 50.1%, indicating that Cu-based energetic materials equip more intense decomposition process than that of Co-based. The second exothermic decomposition stage was seen in the DSC curve after 335.6 °C and a peak was observed at 393.7 °C. The TG curve showed the mass loss is 37.3% in the second stage of decomposition. The final product percentage of 12.7% is in good agreement with the calculated value of Cu (12.4%), indicating that Cu-based anionic MOFs have great potential for eco-friendly energetic materials.

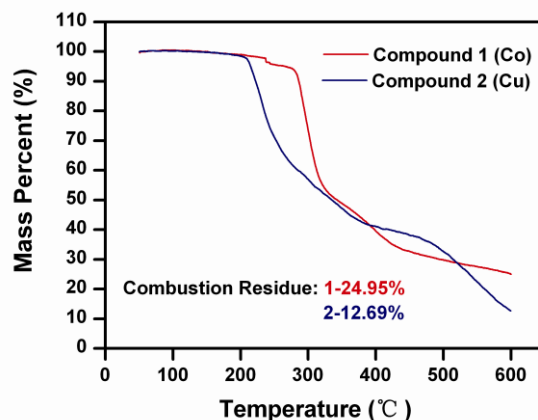

Figure S3. TG spectrums of compounds 1 and 2.

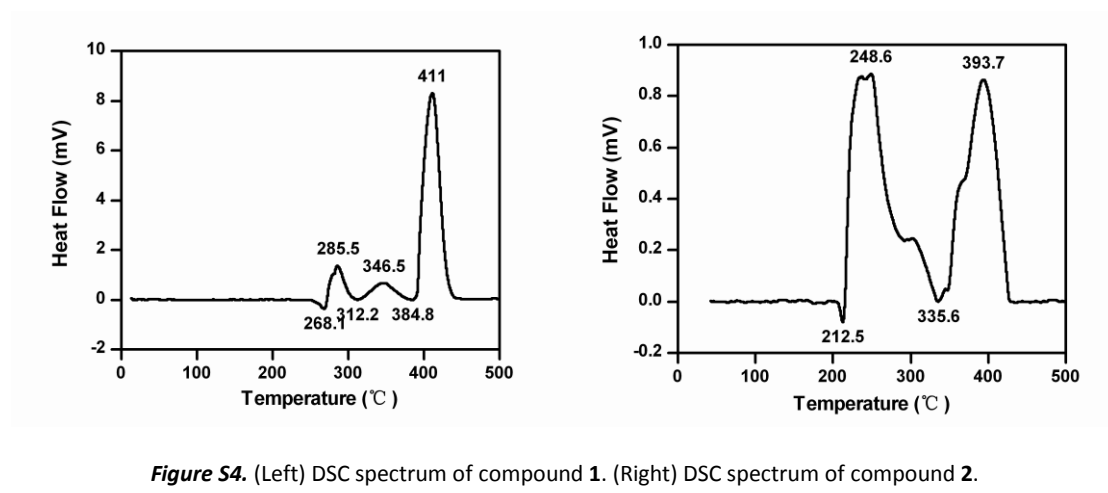

Figure S4. (Left) DSC spectrum of compound 1. (Right) DSC spectrum of compound 2.

## 7. Non-isothermal kinetics analysis

Kinetics parameters, including apparent activation energy ( $E_a$ ) and the pre-exponential factor ( $A$ ), were calculated by using Kissinger's method<sup>5</sup> (Eq. (1)) and Ozawa-Doyle's method<sup>6</sup> (Eq. (2)) according to the peak temperatures of first decomposition processes shown in the DSC curves.

$$\ln \frac{\beta}{T_p^2} = \ln \left( \frac{AR}{E_a} \right) - \frac{E_a}{RT_p} \quad (1)$$

$$\lg \beta + 0.4567 \frac{E_a}{RT_p} = C \quad (2)$$

Where  $T_p$  is the peak temperature (°C) of first reaction process,  $A$  is the pre-exponential factor ( $s^{-1}$ ),  $E_a$  is the apparent activation energy ( $kJ mol^{-1}$ ),  $R$  is the gas constant ( $J mol^{-1} °C^{-1}$ ),  $\beta$  is the heating rate ( $°C$



$\text{min}^{-1}$ ) and C is a constant. The results are listed in table S4. The symbol “r” stands for the standard deviation.  $E_a$  is equal to the average of  $E_k$  and  $E_o$ .

**Table S4.** Peak temperature and kinetics parameters of **1** and **2**.

| $\beta$ ( $^{\circ}\text{C min}^{-1}$ )  | Peaks temperatures $T_p$ ( $^{\circ}\text{C}$ ) |            |
|------------------------------------------|-------------------------------------------------|------------|
|                                          | 1                                               | 2          |
| 5                                        | 268.1                                           | 212.5      |
| 10                                       | 277.2                                           | 218.8      |
| 15                                       | 281.5                                           | 224.0      |
| 20                                       | 285.7                                           | 226.3      |
| Kissinger's method                       |                                                 |            |
| $E_k$ ( $\text{kJ mol}^{-1}$ )           | 191.1                                           | 203.5      |
| Log A ( $\text{s}^{-1}$ )                | 16.26                                           | 19.8       |
| Linear correlation coefficient ( $R_k$ ) | -0.9988                                         | -0.9941    |
| r                                        | 3.393e-002                                      | 7.678e-002 |
| Ozawa-Doyle's method                     |                                                 |            |
| $E_o$ ( $\text{kJ mol}^{-1}$ )           | 190.5                                           | 201.3      |
| Linear correlation coefficient ( $R_k$ ) | -0.9989                                         | -0.9946    |
| r                                        | 1.475e-002                                      | 3.332e-002 |
| $E_a$ ( $\text{kJ mol}^{-1}$ )           | 190.8                                           | 202.4      |

## 8. Sensitivity

Impact sensitivity (IS) was determined by a fall hammer apparatus according to the China National Military Standard. Compound (20mg) is compacted to a copper cap under the press of 39.2 MPa and is hit by 2 kg drop hammer.

Friction sensitivities (FS) of three complexes are measured by applying a Julius Peter's machine using 20 mg sample.

Electrostatic sensitivities (EDS) are tested by using an ESD JGY-50 III Electrostatic test apparatus at 15 kV and 0.22  $\mu\text{F}$ . Test conditions: 25 $^{\circ}\text{C}$  (temperature); 32% (relative humidity).

**Table S5.** The sensitivities of title energetic MOFs **1** and **2**.

| Compound | IS (J) | FS (N) | EDS (J) |
|----------|--------|--------|---------|
| 1        | >40    | >360   | >20     |
| 2        | >40    | >360   | >20     |

## 9. Thermodynamic calculation

Energies of combustion ( $\Delta_c H^{\circ}$ ) and Energies of formation ( $\Delta_f H^{\circ}$ ) are two important parameters to assess the energetic properties of target compounds. They are calculated based on measurements of constant volume combustion energy ( $\Delta_c U^{\circ}$ ). The experimental results for  $\Delta_c U^{\circ}$  of compounds **1** and **2** are shown in

the following table (Table S6). The standard molar enthalpy of combustion ( $\Delta_c H^\circ$ ) can be obtained according to the formula (Eq. (3)).

$$\Delta_c H^\circ = \Delta_c U^\circ + \Delta nRT \quad (3)$$

Where  $\Delta n = \Delta n_i$  (products, g) -  $\Delta n_j$  (reactants, g),  $\Delta n_i$  (mol) and  $\Delta n_j$  (mol) is the total molar amount of gases in the products and reactants, respectively. The enthalpies of formation ( $\Delta_f H^\circ$ , kJ mol<sup>-1</sup>) at 298 K were calculated through the adoption of Hess thermochemical cycle on the basis of the combustion reactions (Eq. (4-5)). The heats of formation ( $\Delta_f H^\circ$ ) of the combustion products, CO<sub>2</sub>(g) and H<sub>2</sub>O (l), are -393.51 kJ mol<sup>-1</sup> and -285.83 kJ mol<sup>-1</sup>, respectively.

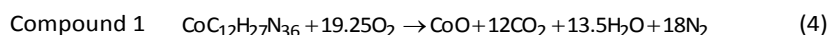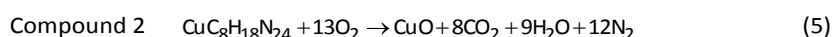

**Table S6.** Thermodynamic parameters of **1** and **2**.

| Compounds | $\Delta_c U^\circ$ ( MJ Kg <sup>-1</sup> ) | $\Delta_c U^\circ$ ( kJ mol <sup>-1</sup> ) | $\Delta_c H^\circ$ (kJ mol <sup>-1</sup> ) | $\Delta_f H^\circ$ (kJ mol <sup>-1</sup> ) |
|-----------|--------------------------------------------|---------------------------------------------|--------------------------------------------|--------------------------------------------|
| 1         | 12.8148                                    | -9412.7089                                  | -9338.3817                                 | 519.6567                                   |
| 2         | 13.0586                                    | -6711.2886                                  | -6661.7372                                 | 783.8872                                   |

## 10. Heat of detonation

The heats of detonation ( $\Delta H_{\text{det}}$ ) of compounds **1** and **2** were calculated using the method adopted by Hope-Weeks.<sup>7</sup> N<sub>2</sub>, NH<sub>3</sub> and H<sub>2</sub>O, except for metal-containing products, were treated as gas. Energies ( $E_f$ ) of title materials compound **1** and **2** were computed by the Density functional theory (DFT) code DMol<sub>3</sub> under 3D periodic boundary conditions employing the Monkhorst Pack multiple K-point sampling of the Brillouin zone and the Perdew–Becke–Ezerhoff (PBE) exchange–correlation function. Energies of formation ( $\Delta E_{\text{det}}$ ) of the two compounds were calculated through the adoption of Hess thermochemical cycle on the basis of the detonation reactions (Eq. (6-8)).

$$\Delta E_{\text{det}} = \sum \Delta E_f(\text{products}) - \sum \Delta E_f(\text{reactant}) \quad (6)$$

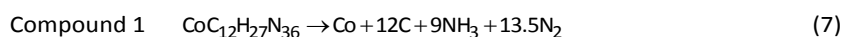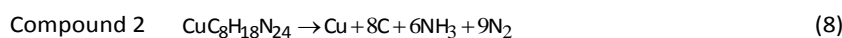

$\Delta H_{\text{det}}$  were estimated using a linear correlation equation (Eq. (9)) with a linearly dependent coefficient at 0.968, and listed in table S7.

$$\Delta H_{\text{det}} = 1.127\Delta_{\text{det}} + 0.046 \quad (9)$$

**Table S7.** Calculated parameters used in the detonation reactions for compounds **1** and **2**.

| complex | $E_f$<br>(hartree) | Metal     | C       | N <sub>2</sub> | NH <sub>3</sub> | $\Delta E_{\text{det}}$<br>(hartree) | $\Delta E_{\text{det}}$<br>(kcal g <sup>-1</sup> ) | $\Delta H_{\text{det}}$<br>(kcal g <sup>-1</sup> ) | $\Delta H_{\text{det}}$<br>(kcal cm <sup>-3</sup> ) |
|---------|--------------------|-----------|---------|----------------|-----------------|--------------------------------------|----------------------------------------------------|----------------------------------------------------|-----------------------------------------------------|
| 1       | -2588.8272         | -145.0077 | -37.738 | -109.447       | -56.5045        | 4.8885                               | 4.1763                                             | 4.7527                                             | 8.0036                                              |
| 2       | -1825.9680         | -196.1132 | -37.738 | -109.447       | -56.5045        | 3.9007                               | 4.7628                                             | 5.4136                                             | 9.8853                                              |

## 11. Detonation performances

Detonation performances of the related energetic MOFs, including detonation velocity (D) and detonation pressure (P), were computed by the empirical Kamlet formula (Eq. (10-12)).

$$D = 1.01\Phi^{1/2}(1+1.30\rho) \quad (10)$$

$$P = 1.558\Phi\rho^2 \quad (11)$$

$$\Phi = 31.68N(MQ)^{1/2} \quad (12)$$

Where D is detonation velocity ( $\text{km s}^{-1}$ ), P is detonation pressure (GPa),  $\rho$  is the density of explosive ( $\text{g cm}^{-3}$ ), N is the moles of detonation gases per gram of explosive ( $\text{mol g}^{-1}$ ), M is the average molecular weight of gaseous products ( $\text{g mol}^{-1}$ ), Q is the heat of detonation ( $\text{kcal g}^{-1}$ ). The detonation reactions are described as Equations (7) and (8).

**Table S8.** The calculation parameters of title energetic MOFs **1** and **2**.

| Compound | N ( $\text{mol g}^{-1}$ ) | M ( $\text{g mol}^{-1}$ ) | Q ( $\text{kcal g}^{-1}$ ) | $\rho$ ( $\text{g cm}^{-3}$ ) | D ( $\text{km s}^{-1}$ ) | P (GPa) |
|----------|---------------------------|---------------------------|----------------------------|-------------------------------|--------------------------|---------|
| 1        | 0.030                     | 23.6                      | 4.75                       | 1.684                         | 10.21                    | 44.45   |
| 2        | 0.029                     | 23.6                      | 5.41                       | 1.826                         | 10.97                    | 53.92   |

Here, Q is Heats of detonation ( $\Delta H_{\text{det}}$ ) mentioned in text.

**Table S9.** Physicochemical and energetic properties of **1** and **2**, along with those of some known high-performance energetic materials.

| Compound                                                                                | $\rho^a$ | N% <sup>b</sup> | $T_d^c$ | Q <sup>d</sup> | D <sup>e</sup> | P <sup>f</sup> | IS <sup>g</sup> | FS <sup>h</sup> |
|-----------------------------------------------------------------------------------------|----------|-----------------|---------|----------------|----------------|----------------|-----------------|-----------------|
| <b>2</b>                                                                                | 1.826    | 65.41           | 219     | 5.41           | 10.97          | 53.92          | >40             | >360            |
| <b>1</b>                                                                                | 1.684    | 68.65           | 277     | 4.75           | 10.21          | 44.45          | >40             | >360            |
| TRTR-3                                                                                  | 2.44     | 49.1            | 355     | 3.96           | 10.4           | 56.5           | 32              | >360            |
| 3-Atrz                                                                                  | 1.83     | 51.68           | 285     | 3.63           | 8.75           | 34.3           | >40             | >360            |
| ATRZ-1                                                                                  | 1.68     | 53.35           | 243     | 3.62           | 9.16           | 35.68          | 22.5            | >360            |
| $[\text{Co}_9(\text{bta})_{10}(\text{Hbta})_2(\text{H}_2\text{O})_{10}]_n$ <sup>8</sup> | 1.71     | 59.85           | 253     | 2.66           | 8.66           | 32.2           | 27              | >360            |
| $[\text{Cu}_4\text{Na}(\text{Mtta})_5(\text{CH}_3\text{CN})]_n$ <sup>9</sup>            | 1.98     | 40.1            | 384     | 2.37           | 7.23           | 24.4           | 36              | >360            |
| $[\text{Cu}(\text{Htztr})_2(\text{H}_2\text{O})_2]_n$ <sup>10</sup>                     | 1.89     | 57.7            | 345     | 2.13           | 8.18           | 30.6           | >40             | >360            |
| ATRZ-2                                                                                  | 2.16     | 43.76           | 257     | 1.38           | 7.77           | 29.7           | 30              | >360            |
| NHP                                                                                     | 1.98     | 33.49           | 220     | 1.37           | 9.18           | 39.69          |                 |                 |
| $[\text{Pb}(\text{Htztr})_2(\text{H}_2\text{O})]_n$ <sup>11</sup>                       | 2.52     | 39.4            | 340     | 1.36           | 7.72           | 31.6           | >40             | >360            |
| $\{[\text{Cu}(\text{tztr})] \cdot \text{H}_2\text{O}\}_n$ <sup>10</sup>                 | 2.32     | 45.2            | 325     | 1.32           | 7.92           | 32             | >40             | >360            |

|                                                                                                                                                           |      |       |     |      |      |       |      |      |
|-----------------------------------------------------------------------------------------------------------------------------------------------------------|------|-------|-----|------|------|-------|------|------|
| CHP                                                                                                                                                       | 1.95 | 14.71 | 194 | 1.25 | 8.23 | 31.73 | 5    |      |
| [Ag(ntz)] <sub>n</sub> <sup>12</sup>                                                                                                                      | 3.12 | 25.4  | 305 | 1.16 | 7.94 | 36.5  | >40  | >360 |
| NHN <sup>7,19</sup>                                                                                                                                       | 2.16 | 40.14 |     | 1.04 | 7.30 | 20.2  |      |      |
| [Ag(atz)] <sub>n</sub> <sup>12</sup>                                                                                                                      | 2.97 | 29.3  | 348 | 0.78 | 6.52 | 24.1  | >40  | >360 |
| CHHP                                                                                                                                                      | 2    | 23.58 | 231 | 0.75 | 6.21 | 17.96 | 7.5  |      |
| ZHHP                                                                                                                                                      | 2.12 | 23.61 | 293 | 0.7  | 7.02 | 23.58 |      |      |
| [Pb(H <sub>2</sub> tztr)(O)] <sub>n</sub> <sup>11</sup>                                                                                                   | 3.51 | 27.2  | 318 | 0.26 | 8.12 | 40.1  | >40  | >360 |
| [Co <sub>9</sub> (bta) <sub>10</sub> (Hbta) <sub>2</sub> (H <sub>2</sub> O) <sub>10</sub> ] <sub>n</sub> ·(22 H <sub>2</sub> O) <sub>n</sub> <sup>8</sup> | 1.96 | 51.78 | 300 |      |      |       | >40  | >360 |
| Cu(Mtta) <sub>2</sub> (NO <sub>3</sub> ) <sub>2</sub> <sup>13</sup>                                                                                       | 1.91 | 39.38 | 380 |      |      |       | 24.5 | >360 |
| Cu(3,5-DNBA)(N <sub>3</sub> ) <sup>14</sup>                                                                                                               | 2.03 | 22.1  | 275 |      |      |       | 23.5 | >360 |
| [Cu <sub>3</sub> (MA) <sub>2</sub> (N <sub>3</sub> ) <sub>3</sub> ] <sup>15</sup>                                                                         | 2.09 | 47.55 | 178 | 2.47 | 8.47 | 35.32 | >40  | >360 |

H2bta=N,N-bis(1H-tetrazole-5-yl)-amine; Mttta=1-methyltetrazole or 5-methyltetrazole; H2tztr=3-(1H-tetrazol-5-yl)-1H-triazole ; Hatz =3-amine-1H-1,2,4-triazole ; Hntz = 3-nitro-1H-1,2,4-triazole; 3,5-DNBA=3,5-dinitrobenzoic acid; MA=melamine.

## 12. References

- 1 G. M. Sheldrick, SHELXS-97, Program for X-ray Crystal Structure Determination, University of Göttingen, Germany, 1997.
- 2 G. M. Sheldrick, SHELXL-97, Program for X-ray Crystal Structure Refinement, University of Göttingen, Germany, 1997.
- 3 R. Meyer and J. Köhler (Eds.), *Explosives*, 4th ed. revised and extended, VCH Publishers, New York, 1993, **149**.
- 4 R. Meyer and J. Köhler (Eds.), *Explosives*, 4th ed. revised and extended, VCH Publishers, New York, 1993, **197**.
- 5 H. E. Kissinger, *Anal. Chem.*, 1957, **29**, 1702-1706.
- 6 T. Ozawa, *Bull. Chem. Soc. Jpn.*, 1965, **38**, 1881-1886.
- 7 O. S. Bushuyev, B. P. Prown, A. Maiti, R. H. Gee, G. R. Peterson, B. L. Weeks, L. J. Hope-Weeks, *J. Am. Chem. Soc.*, 2012, **134**, 1422-1425.
- 8 S. Zhang, X. Liu, Q. Yang, Z. Su, W. Gao, Q. Wei, G. Xie, S. Chen, S. Gao, *Chem. Eur. J.*, 2014, **20**, 7906-7910.
- 9 Y. Feng, X. Liu, L. Duan, Q. Yang, Q. Wei, G. Xie, S. Chen, X. Yang, S. Gao, *Dalton Trans.*, 2015, **44**, 2333-2339.
- 10 X. Liu, W. Gao, P. Sun, Z. Su, S. Chen, Q. Wei, G. Xie, S. Gao, *Green Chem.*, 2015, **17**, 831-836.
- 11 W. Gao, X. Liu, Z. Su, S. Zhang, Q. Yang, Q. Wei, S. Chen, G. Xie, X. Yang, S. Gao, *J. Mater. Chem. A*, 2014, **2**, 11958-11965.
- 12 X. Qu, S. Zhang, Q. Yang, Z. Su, Q. Wei, G. Xie, S. Chen, *New J. Chem.*, 2015, **39**, 7849-7857.
- 13 Q. Yang, S., G. Xie, S. Gao, *Journal of Hazardous Materials*, 2011, **197**, 199-203.
- 14 X. Liu, Q. Yang, Z. Su, S. Chen, G. Xie, Q. Wei, S. Gao, *RSC Adv.*, 2014, **4**, 16087-16093.
- 15 H. Zhang, M. Zhang, P. Lin, V. Malgras, J. Tang, S. M. Alshehri, Y. Yamauchi, S. Du, J. Zhang, *Chem. Eur. J.*, 2016, **22**, 1141-1145.
